# Supplementary material for: HuD (ELAVL4) gain-of-function impairs neuromuscular junctions and induces apoptosis in familial and sporadic amyotrophic lateral sclerosis models
Source: Research Square preprint supplement (doi:10.21203/rs.3.rs-3200249/v1), 2023-09-07
Supplement: Supplementary file 1 [file 8e03216d81b18a35293d63fd.pdf]

## **SUPPLEMENTARY MATERIAL**

### **HuD (ELAVL4) gain-of-function impairs neuromuscular junctions and induces apoptosis in familial and sporadic amyotrophic lateral sclerosis models**

Beatrice Silvestri<sup>1,2</sup>, Michela Mochi<sup>1</sup>, Darilang Mawrie<sup>3</sup>, Valeria de Turris<sup>2</sup>, Alessio Colantoni<sup>1,2</sup>, Beatrice Borhy<sup>1</sup>, Maria Giovanna Garone<sup>4</sup>, Christopher Patrick Zammerilla<sup>3</sup>, Udai B. Pandey<sup>3</sup> and Alessandro Rosa<sup>1,2,\*</sup>

1. Department of Biology and Biotechnologies "Charles Darwin", Sapienza University of Rome, Rome, Italy.
2. Center for Life Nano- & Neuro-Science, Fondazione Istituto Italiano di Tecnologia (IIT), Rome, Italy.
3. Department of Pediatrics and Neurology, University of Pittsburgh Medical Center, PA, USA.
4. Department of Stem Cell Biology, Murdoch Children's Research Institute, The Royal Children's Hospital, Parkville, Melbourne, Victoria, Australia.

\* corresponding author: [alessandro.rosa@uniroma1.it](mailto:alessandro.rosa@uniroma1.it)

**A**

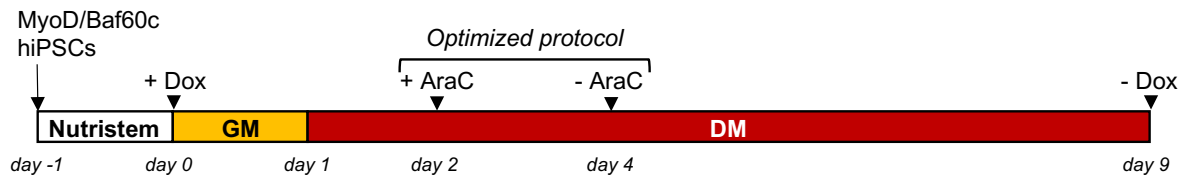

**B**

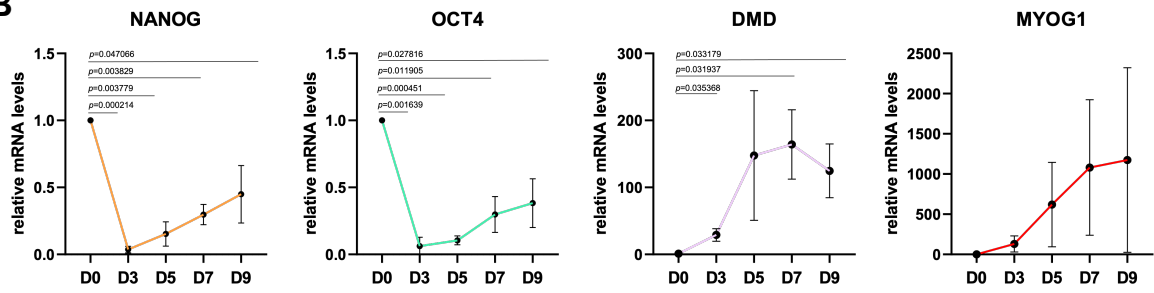

**C**

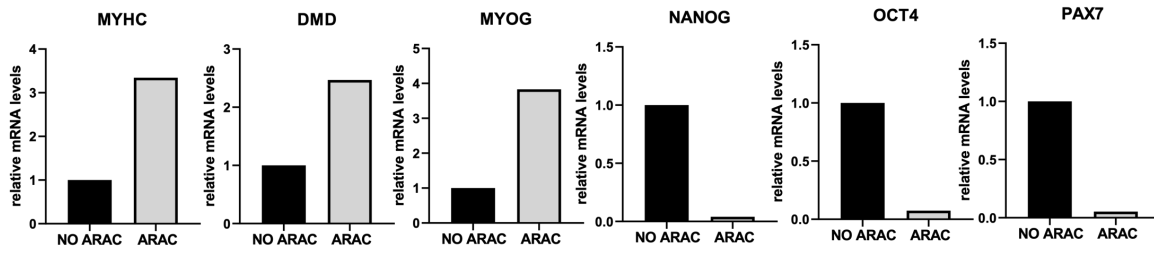

**D**

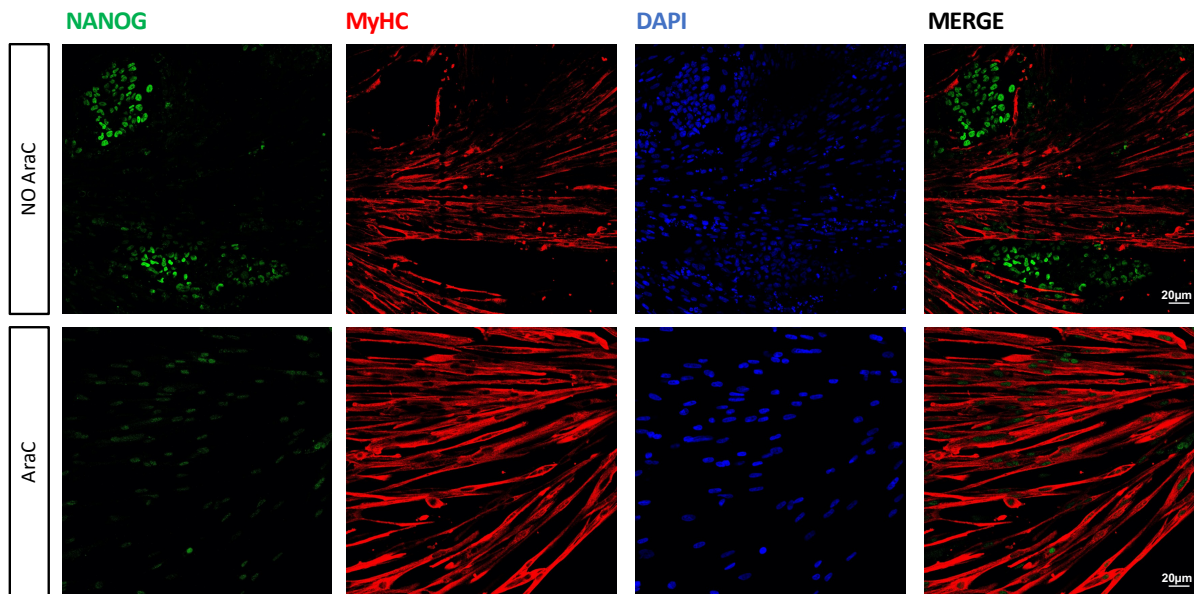

**Supplementary Figure S1. Optimization of the skeletal muscle differentiation protocol. Related to Figure 1.**

(A) Schematic representation of the iPSC differentiation method to obtain SkMCs. (B) qRT-PCR expression analysis of pluripotency (*NANOG*, *OCT4*) and differentiation (*DMD*, *MYOG1*) markers, normalized on *ATP5O* expression, at the indicated time points (Day 0, 3, 5, 7, 9) from differentiation experiments performed without the use of cytosine arabinoside (AraC) at days 2 to 4 of the protocol, i.e. using the original method described in (Lenzi et al., 2016). Error bars indicate standard deviation (n=3 Student's t-test, paired, two tails). (C) Comparative qRT-PCR analysis of the expression of stemness/pluripotency (*PAX7*, *OCT4*, *NANOG*) and muscle (*DMD*, *MYOG1* and *MYHC*) markers at day 13 of differentiation (n=1), using the original (NO AraC) or optimized (AraC) protocol. *ATP5O* expression was used for normalization. (D) Immunofluorescence analysis of SkMCs as in (C). Nuclei were stained with DAPI (blue). Scale bar: 20µm.

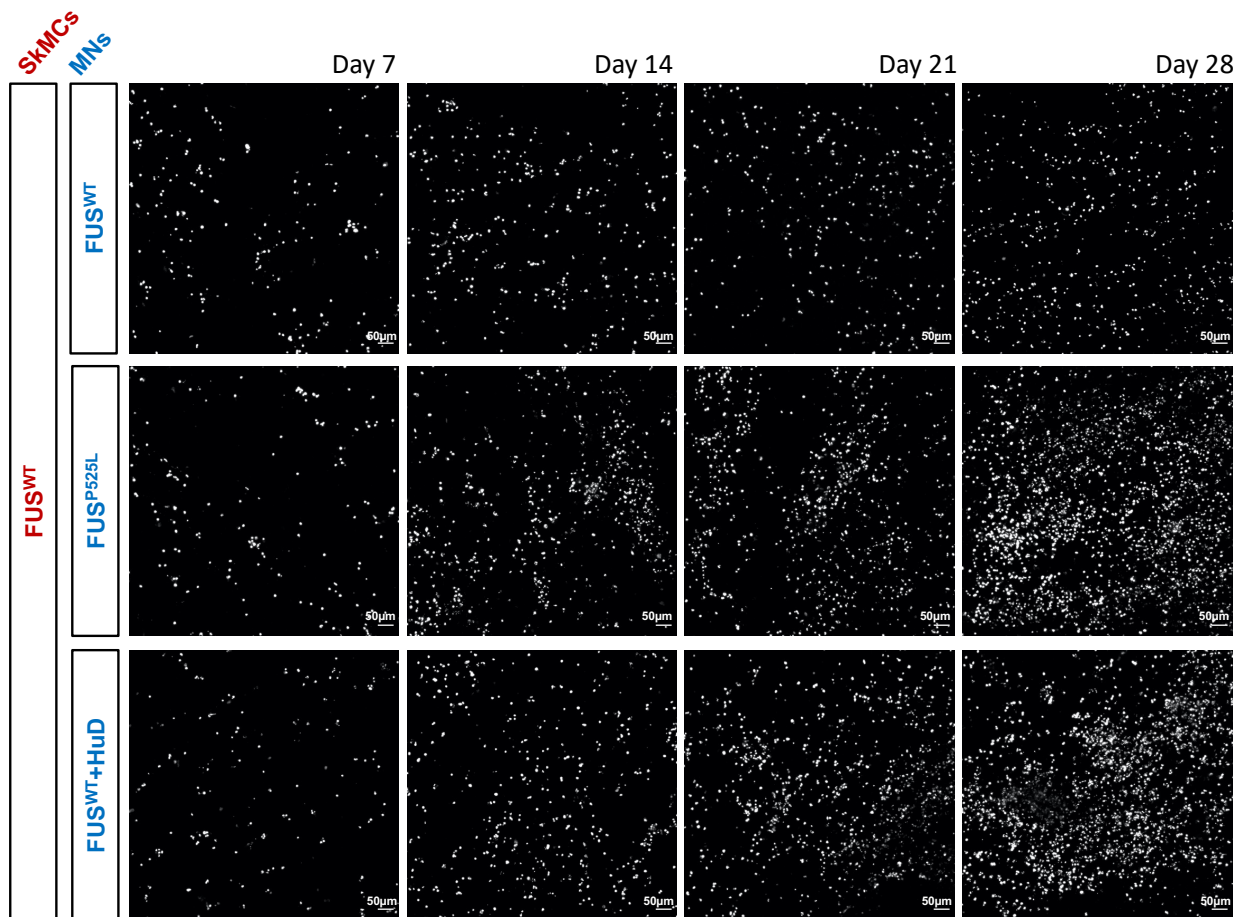

**Supplementary Figure S2. Dead cell staining. Related to Figure 4.**

Representative images of co-cultures stained with Ethidium Homodimer-1 (gray), used for quantification shown in Figure 4B. Scale bar: 50µm.



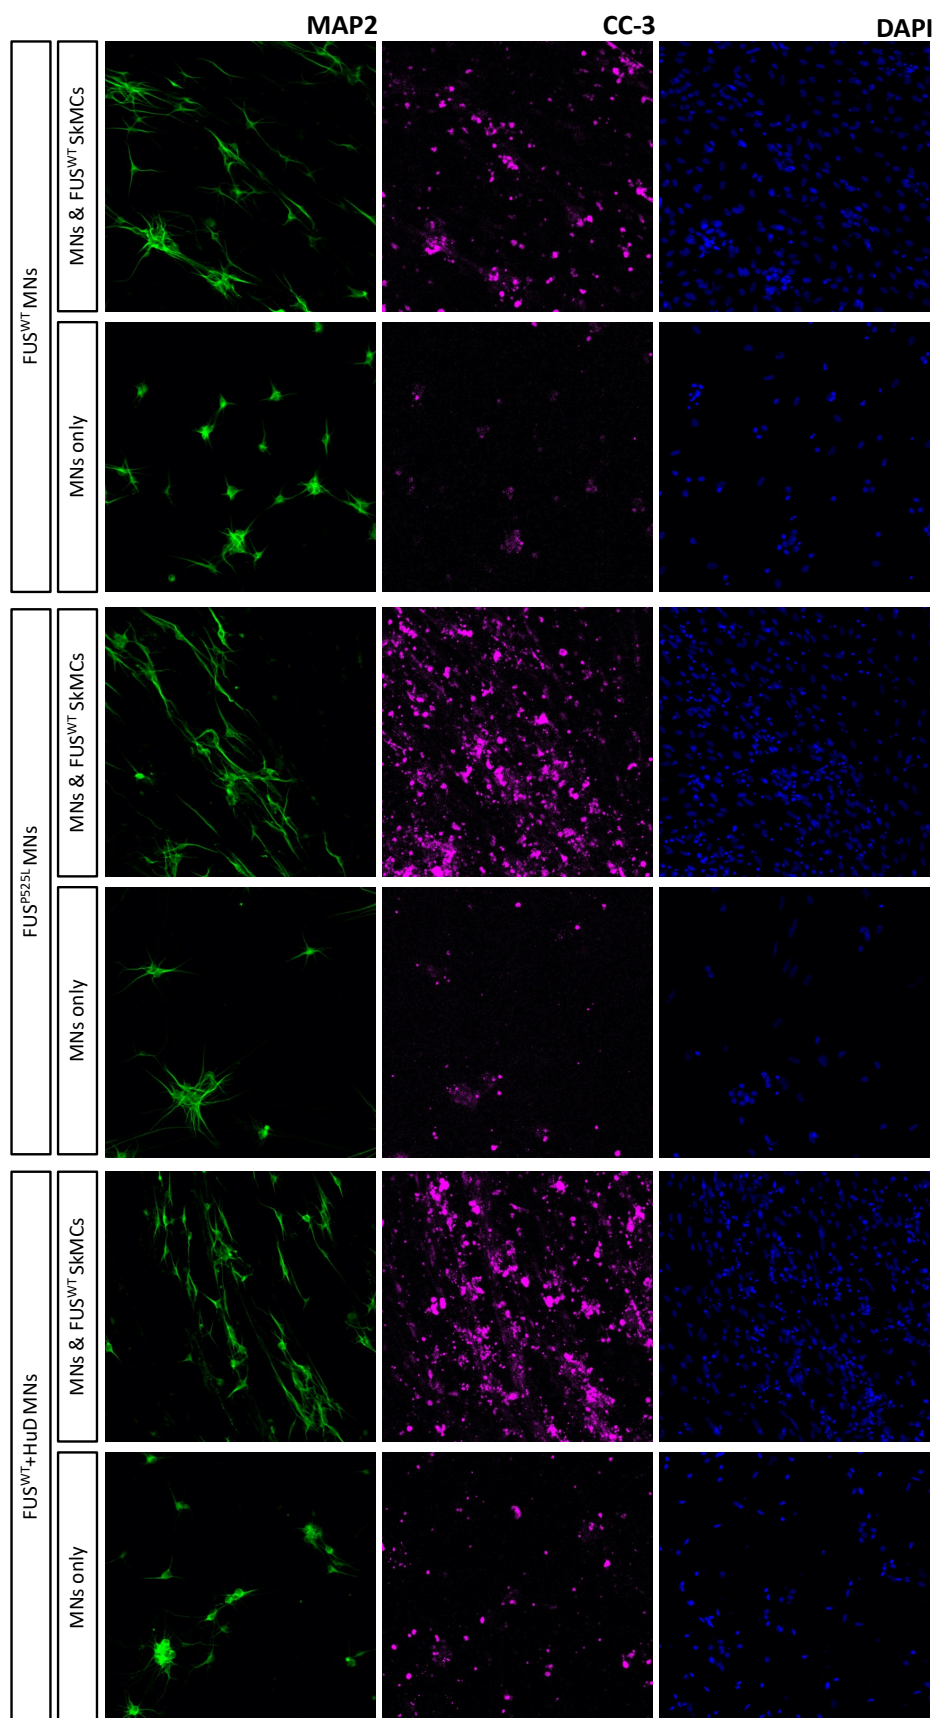

**Supplementary Figure S3. Single panels of immunofluorescence staining. Related to Figure 4.**

Single panels of immunofluorescence staining, shown in Figure 4C as merged images, of co-cultures or MN monocultures at day 14, using Cleaved Caspase-3 (CC-3) and MAP2 antibodies, and DAPI.

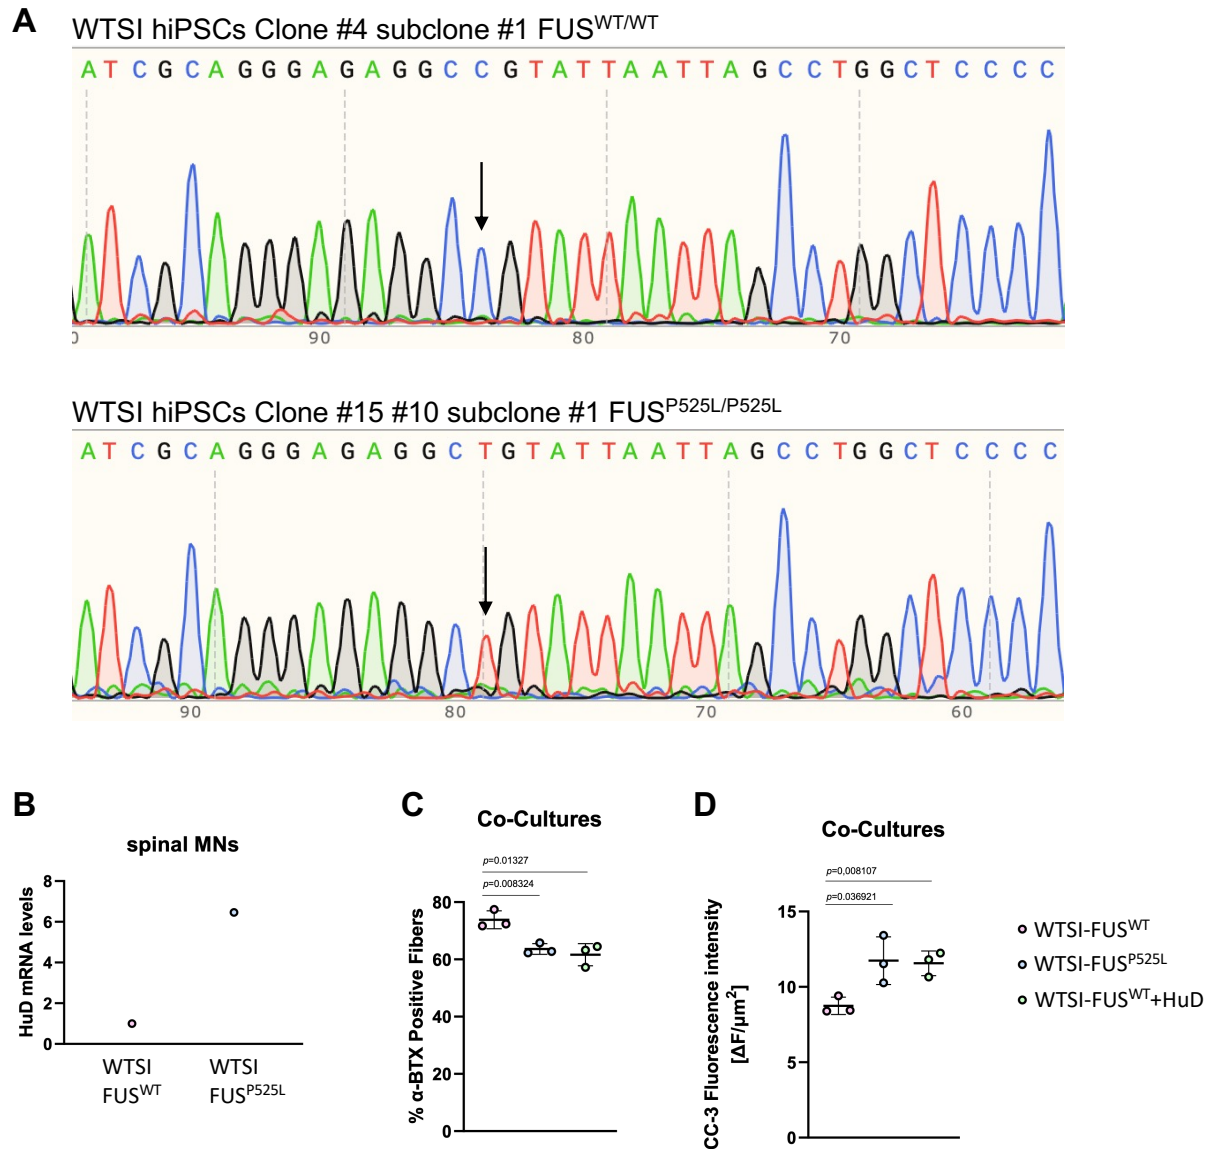

**Supplementary Figure S4. Generation and characterization of the new FUS<sup>P525L</sup> mutant line derived from WTSli004-A iPSCs. Related to Figure 4.**

(A) Sanger sequencing of a wild-type clone (top) and a FUS<sup>P525L</sup> mutant (bottom) clone derived from the WTSli004-A iPSC line (EBiSC) as previously described (Lenzi et al., 2015). These lines are named WTSI-FUS<sup>WT</sup> and WTSI-FUS<sup>P525L</sup> in the present paper. Arrows indicate the targeted nucleotide in codon 525: C, wild type; T, mutant. (B) Analysis of *HuD* mRNA levels in WTSI-FUS<sup>WT</sup> and WTSI-FUS<sup>P525L</sup> spinal MNs at day 12 of differentiation. TUBB3 has been used for normalization (n=1). (C) The graph reports quantitative analysis of the percentage of α-BTX positive fibers at day 14 of co-cultures made with FUS<sup>WT</sup> SkMCs and WTSI-FUS<sup>WT</sup>, WTSI-FUS<sup>P525L</sup>, or WTSI-FUS<sup>WT</sup>+HuD spinal MNs, as indicated. Error bars indicate standard deviation (n=3, Student's t-test; unpaired; two tails). (D) The graph reports quantitative analysis of the CC-3 fluorescence intensity at day 14 of co-cultures as in (C). Error bars indicate standard deviation (n=3, Student's t-test; unpaired; two tails).

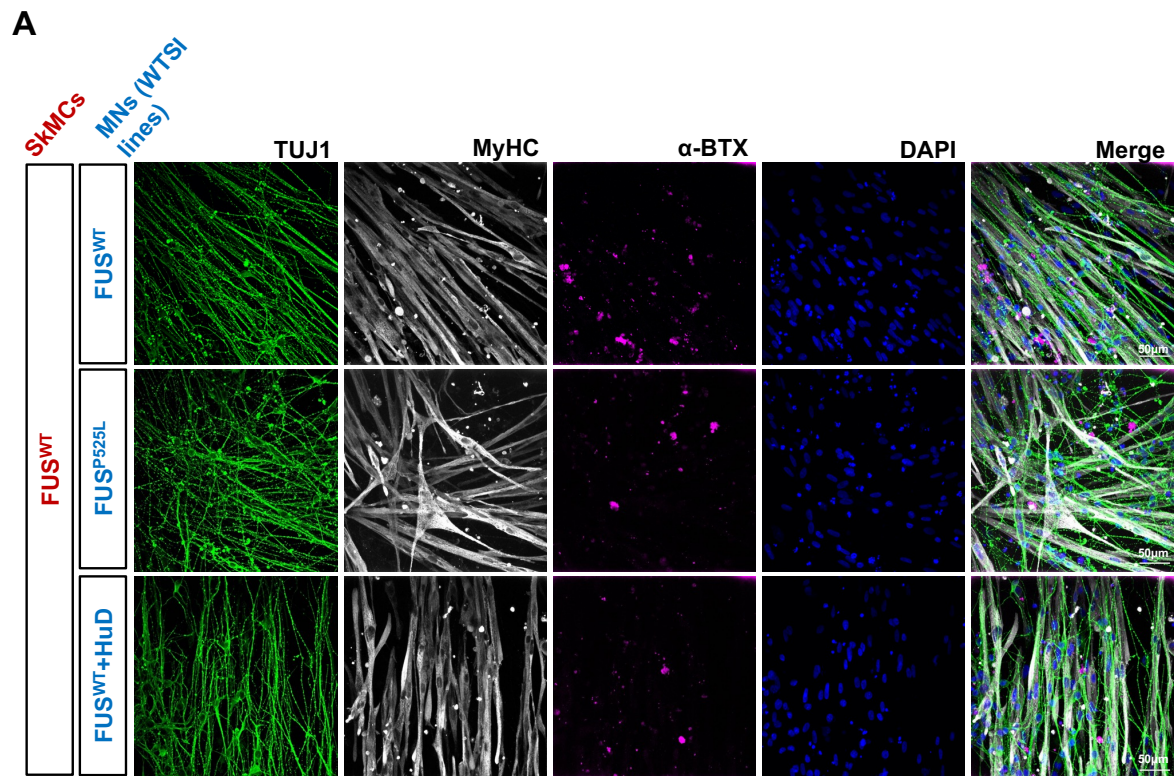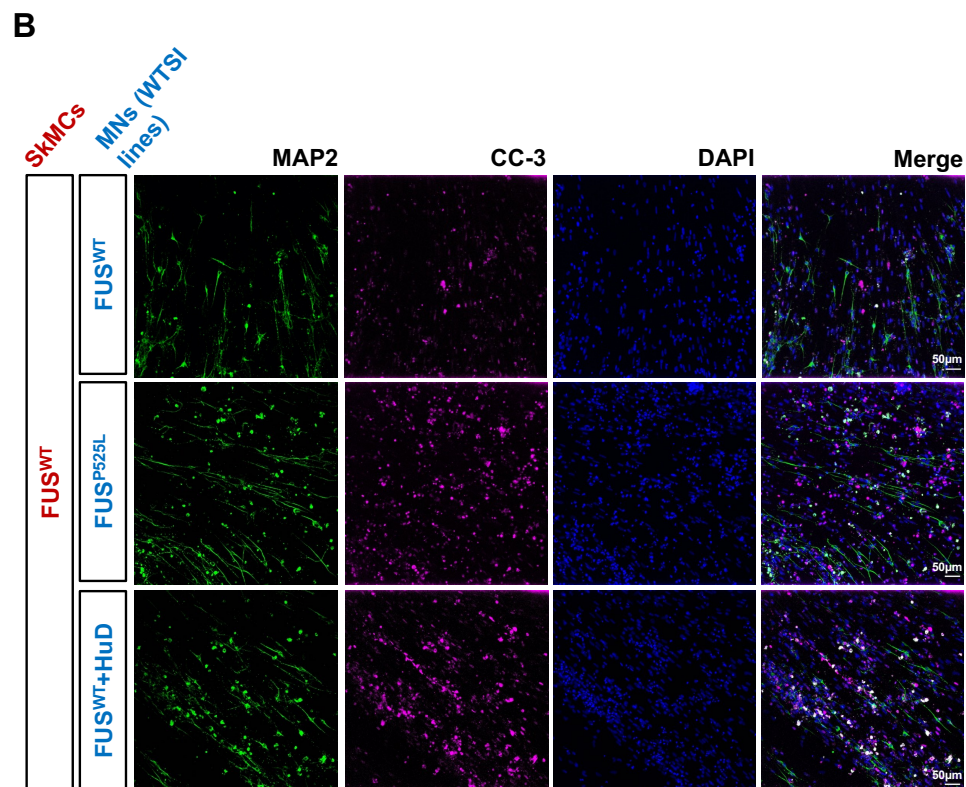

**Supplementary Figure S5. Images used for quantification (WTSl co-cultures). Related to Figure 4.**

(A-B) Images used for quantification analyses of Supplementary Figure S4C (panel A) and Supplementary Figure S4D (panel B). Scale bar: 50µm.



**A**

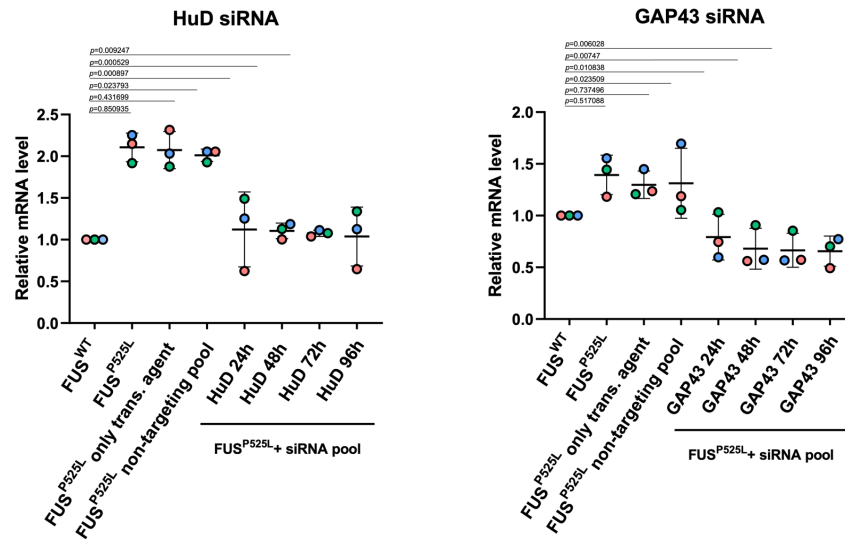

**B**

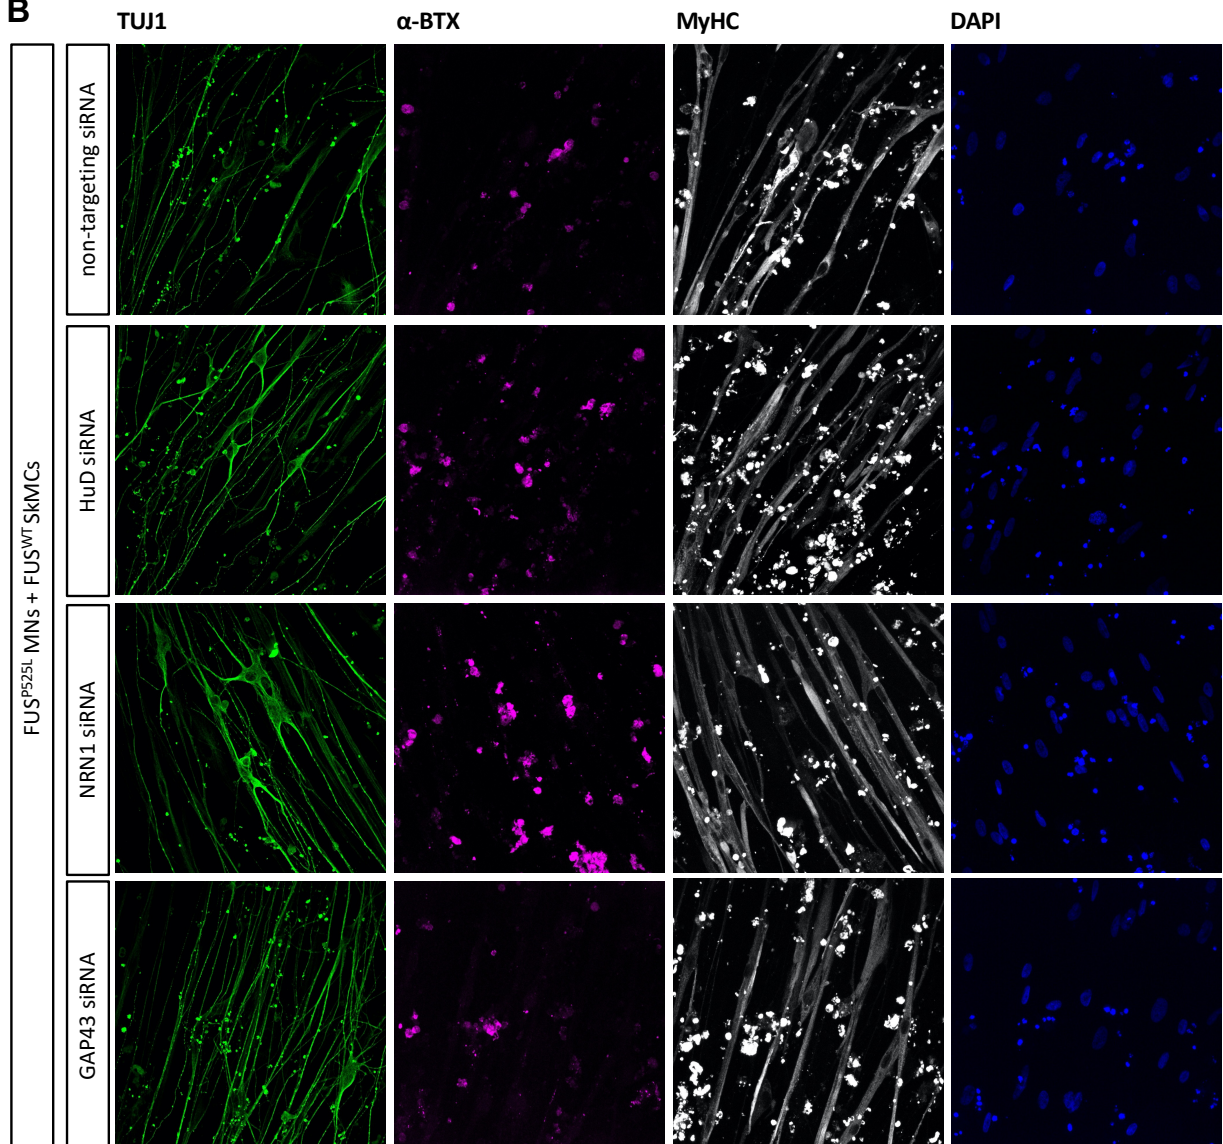

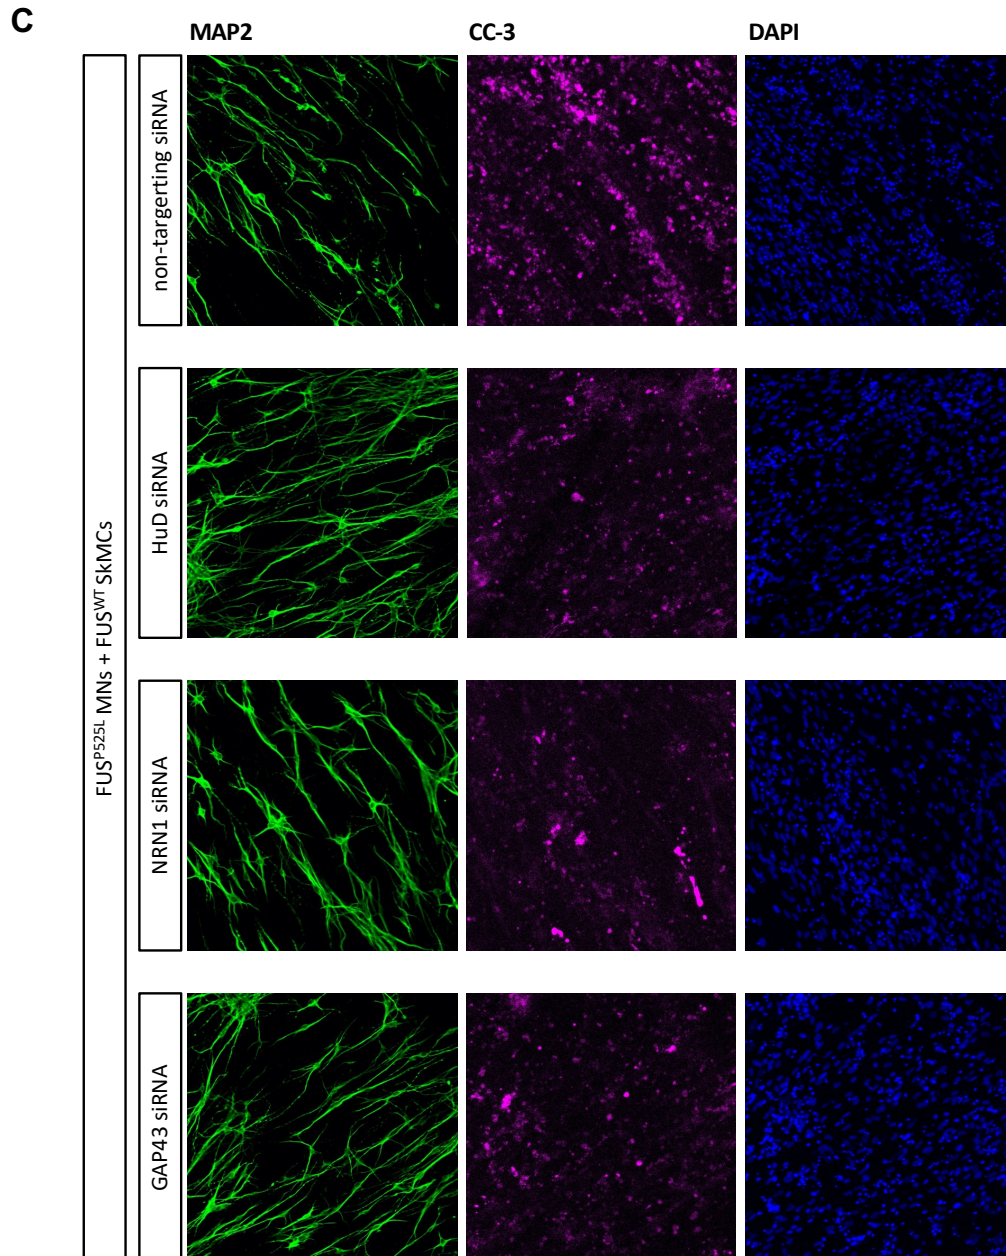

**Supplementary Figure S6. Knockdown by RNAi in FUS<sup>P525L</sup> MNs and co-cultures. Related to Figure 5.**

(A) Analysis of *HuD* (left) and *GAP43* (right) mRNA levels in untransfected FUS<sup>WT</sup> and FUS<sup>P525L</sup> spinal MNs and FUS<sup>P525L</sup> spinal MNs transfected with non-targeting control siRNA or siRNAs targeting *HuD* or *GAP43*. *ATP5O* has been used for normalization. Values indicated in the graphs are relative to untransfected FUS<sup>WT</sup> samples. The graphs show the average and standard deviation from a biological triplicate (Student's t-test; unpaired; two tails). The same analysis for validating siRNAs targeting NRN1, used in the present work, had been previously reported (Garone et al., 2021). (B,C) Single panels of the immunofluorescence staining, shown in Figure 5A,B as merged images, of co-cultures made with FUS<sup>WT</sup> SkMCs and FUS<sup>P525L</sup> MNs.



**A**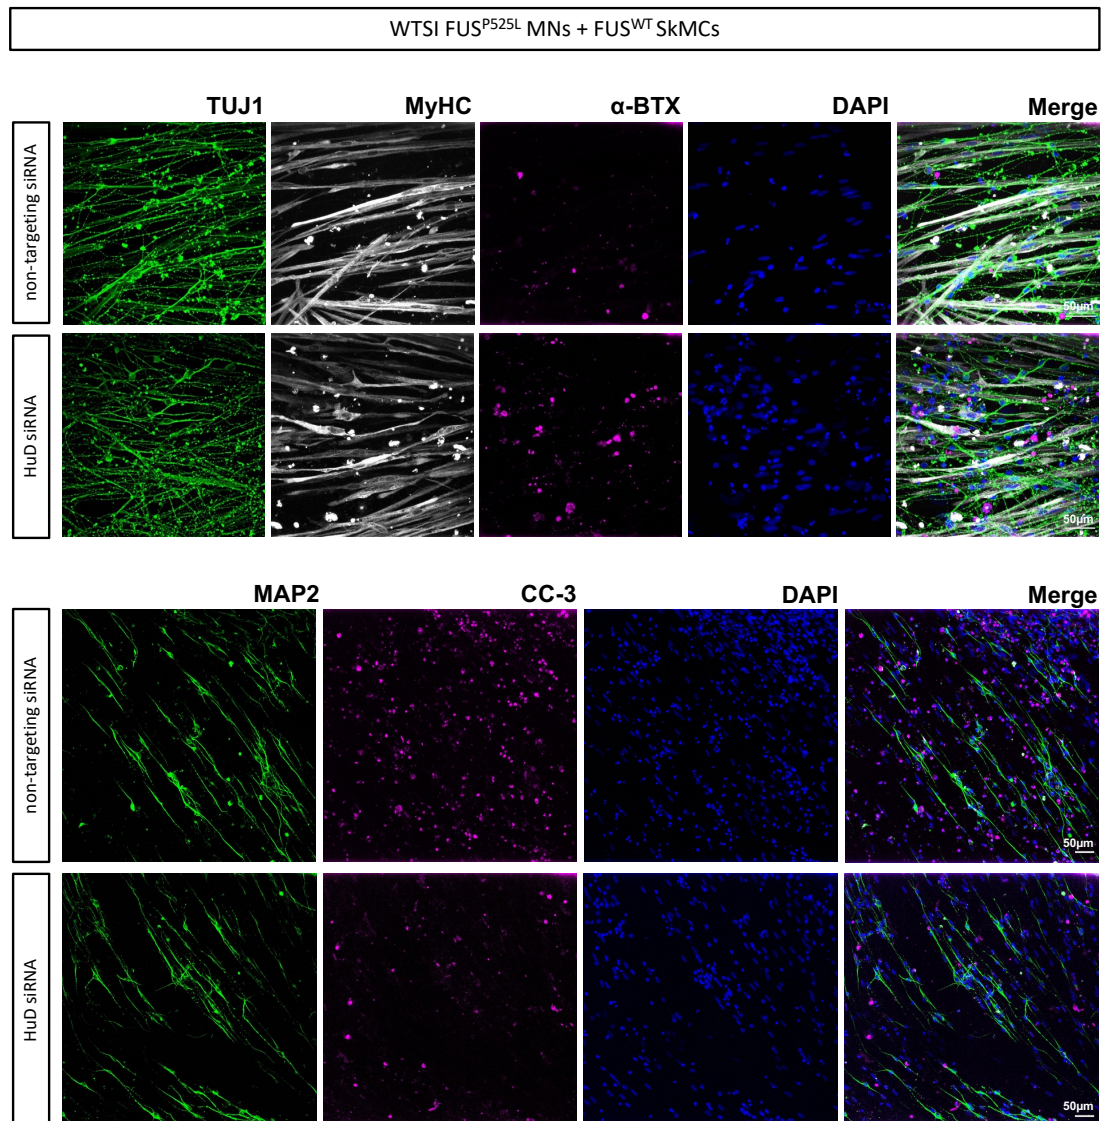**B**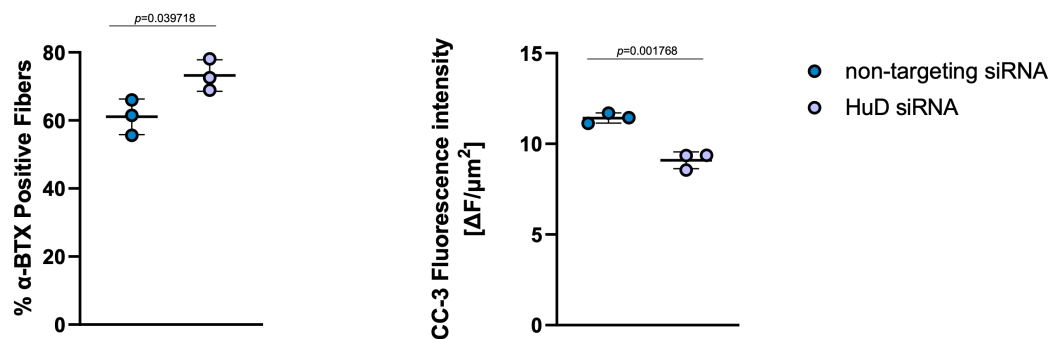

**Supplementary Figure S7. HuD knockdown in co-cultures containing WTISI-FUS<sup>P525L</sup> MNs. Related to Figure 5.**

(A) Representative images of day 14 co-cultures obtained with FUS<sup>WT</sup> SkMCs and WTISI-FUS<sup>P525L</sup> MNs transfected with non-targeting control or HuD siRNAs and stained with the indicated antibodies.

Scale bar: 50 $\mu$ m. (B) The graphs report quantitative analysis of the percentage of  $\alpha$ -BTX positive fibers (left) and CC-3 fluorescence intensity (right), at day 14 of co-culture as in (A). The graphs show the average and standard deviation from a biological triplicate (Student's t-test; unpaired; two tails).



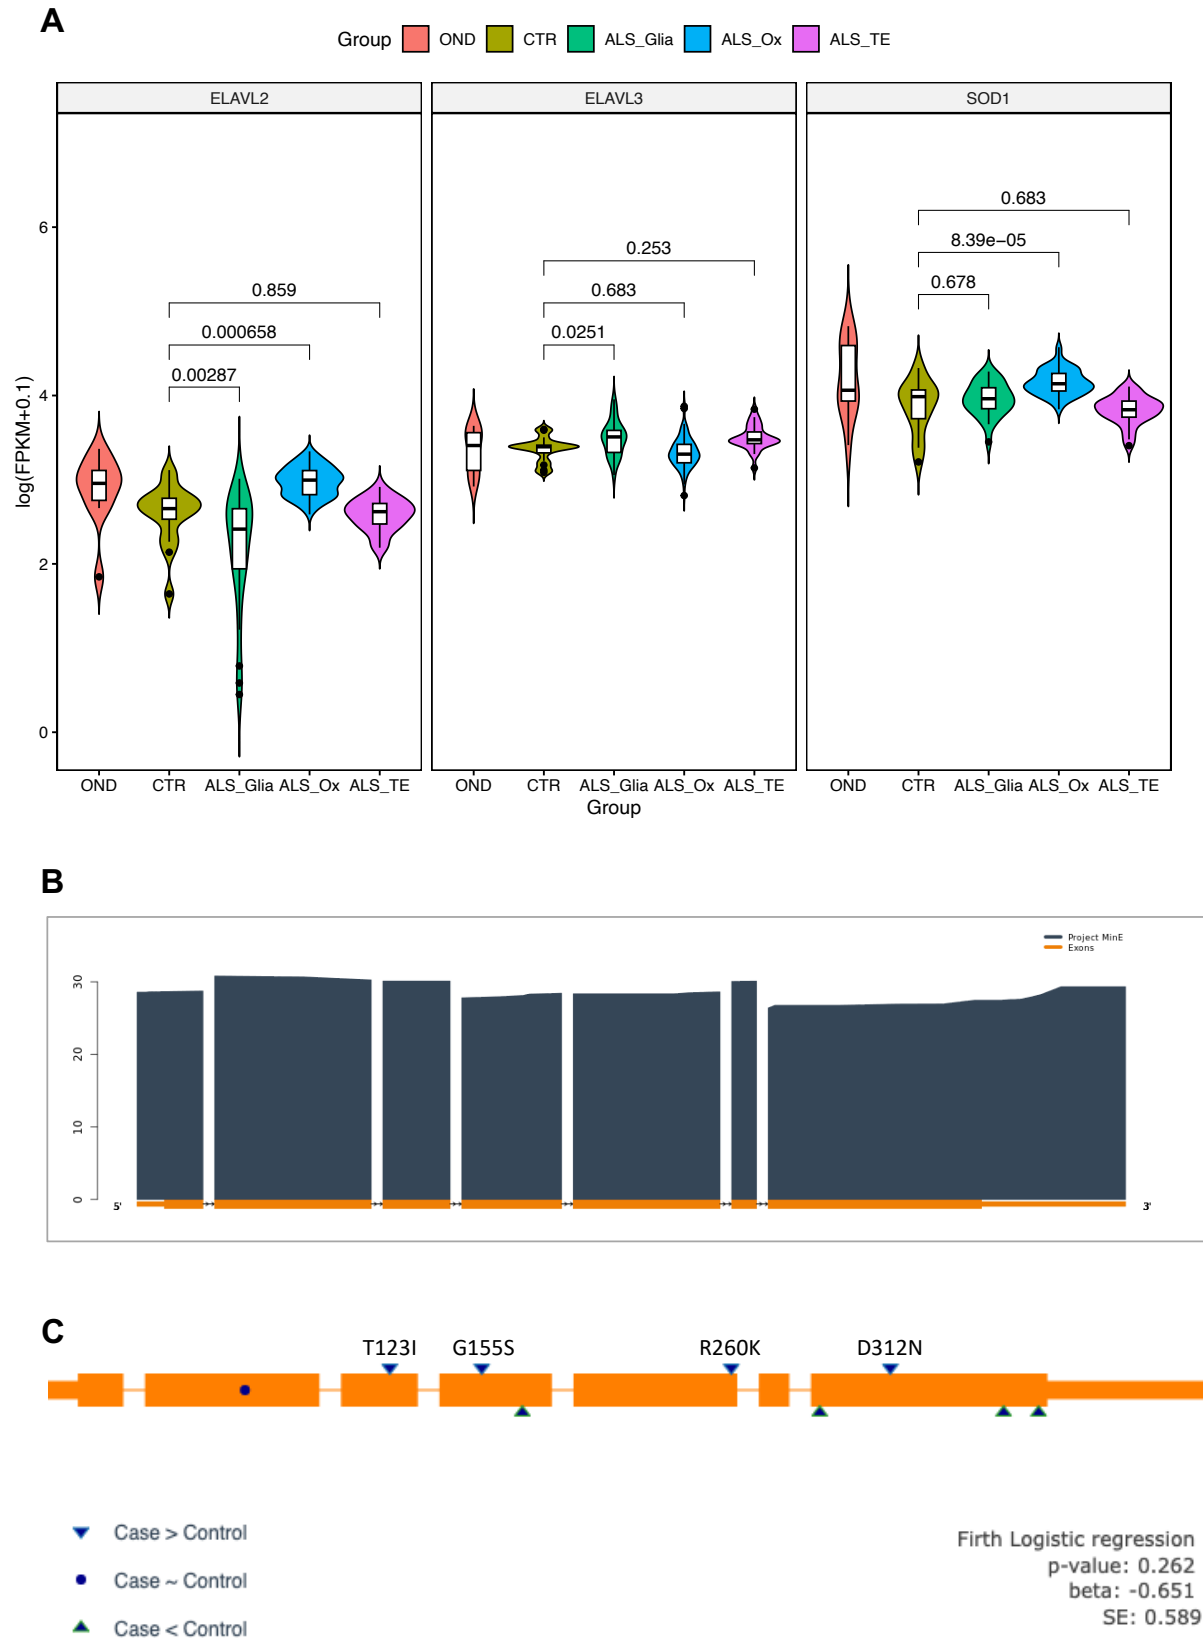

**Supplementary Figure S8. Analysis of nELAVLs and SOD1 expression in sporadic ALS patients and *HuD* variants. Related to Figure 7.**

(A) Violin plots showing the expression levels, reported as log-transformed FPKM values, of *ELAVL2* (*HuB*), *ELAVL3* (*HuC*) and *SOD1* in post-mortem sporadic ALS patients' cortex samples from (Tam

et al., 2019). OND: other neurodegenerative diseases; CTR: healthy individuals; ALS\_Glia: sporadic ALS patients with a signature of glial activation; ALS\_Ox: sporadic ALS patients with a signature of oxidative and proteotoxic stress; ALS\_TE: sporadic ALS patients with a signature of high retrotransposon expression. The adjusted  $p$ -values obtained from differential expression analyses are shown. (B-C) Snapshots of the Project MinE data browser (<http://databrowser.projectmine.com>): coverage of the *HuD* gene (B) and exons (orange blocks) with the variants (triangles) that are reported in the current dataset (C). Variants that have been found with a higher frequency in ALS cases than controls are indicated.

**Supplementary Table S1. List of primers used in this study.**

| <b>Name</b> | <b>Sequence or assay</b>                         |
|-------------|--------------------------------------------------|
| NANOG FW    | CCAAATTCTCCTGCACGTGAC                            |
| NANOG RV    | CACGTGGTTTCCAAACAAGAAA                           |
| ATP5O FW    | ACTCGGGTTTGACCTACAGC                             |
| ATP5O RV    | GGTACTGAAGCATCGCACCT                             |
| HuD FW      | CAACCCCAGCCAGAAGTCCA                             |
| HuD RV      | AGCCTGAACCTCTGAGCCTG                             |
| NRN1 FW     | GGCTTTTCGGACTGTTTGCTCA                           |
| NRN1 RV     | ATCCTCCCAGTATGTGCACACG                           |
| GAP43 FW    | GAGGAGCCTAAACAAGCCGATG                           |
| GAP43 RV    | GGGCACTTTCCTTAGGTTTGGT                           |
| MYH1        | Hs_MYH1_2_SG QuantiTect Primer Assay, QT01671005 |
| MYOG        | Hs_MYOG1_SG QuantiTect Primer Assay, QT00001722  |
| DMD         | Hs_DMD_1_SG QuantiTect Primer Assay, QT00085778  |
| OCT4 FW     | ATGCATTCAAACCTGAGGTGCCTGC                        |
| OCT4 RV     | AACTTCACCTTCCCTCCAACCAGT                         |
| PAX7 FW     | CAGAGGACCAAGCTGACAGA                             |
| PAX7 RV     | CTGGCAGAAGGTGGTTGAAC                             |
| SOD1 FW     | TGAAGGTGTGGGGAAGCATT                             |
| SOD1 RV     | TCTCTTCATCCTTTGGCCCA                             |
| TUBB3 FW    | CCCGGAACCATGGACAGTGT                             |
| TUBB3 RV    | TGACCCTTGGCCCAGTTGTT                             |
